# Supplementary material for: Constructing high-performance electrode materials using core–shell ZnCo2O4@PPy nanowires for hybrid batteries and water splitting
Source: Royal Society of Chemistry journal article supplement (doi:10.1039/d0ra05177b), 2020-01-01
Supplement: d0ra05177b1.pdf [file d0ra05177b1.pdf]

## Supporting Information

### Constructing high performance electrode materials through core-shell ZnCo<sub>2</sub>O<sub>4</sub>@PPy nanowires for hybrid battery and water splitting

Xiaoyun Liu<sup>1,\*</sup>, Qian Li<sup>1</sup>, Yanli Qin<sup>1</sup>, Yueqiu Jiang<sup>2,\*</sup>,

<sup>1</sup>School of Science, Shenyang Ligong University, Shenyang 110159, P. R. China

<sup>2</sup> Department of Development and Planning, Shenyang Ligong University, Shenyang  
110159, P. R. China

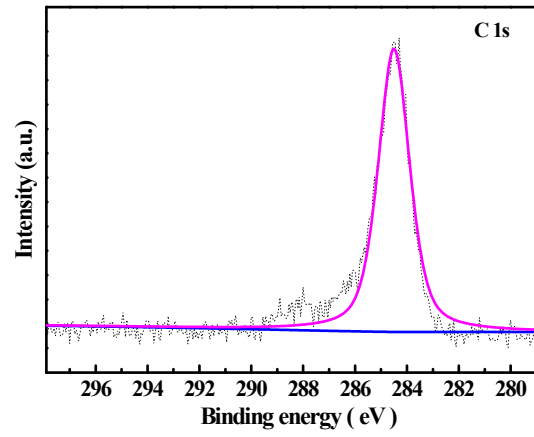

Fig. S1. C1s XPS spectra of ZnCo<sub>2</sub>O<sub>4</sub>@PPy-50 electrode material

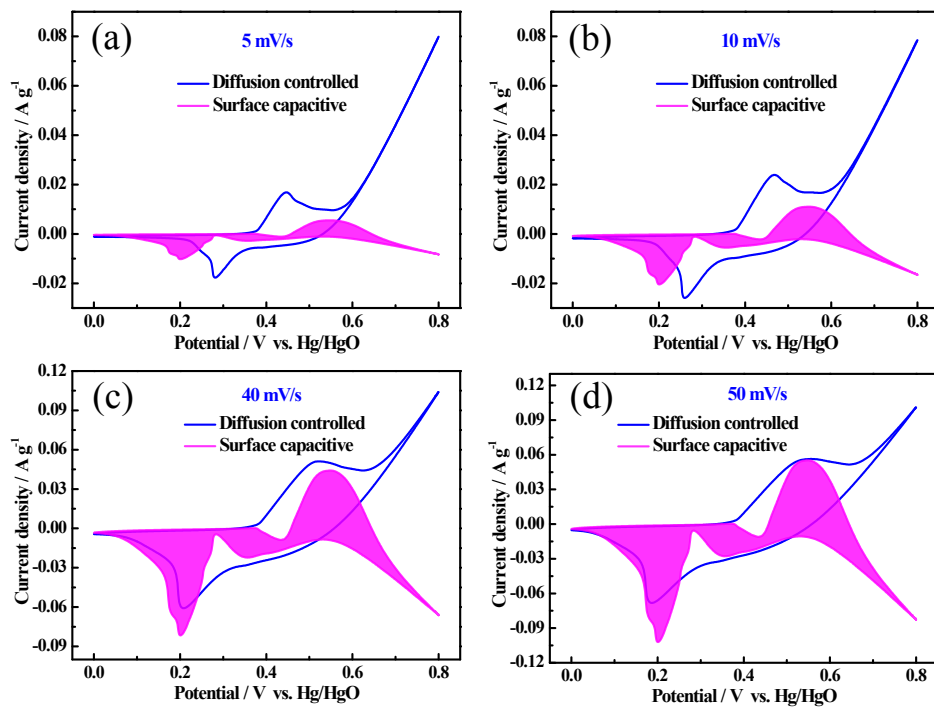

Fig. S2. Capacitive and diffusion contributions at a scan of 5, 10, 40 and 50  $\text{mV s}^{-1}$
